# Supplementary material
Source: PubMed Central journal article supplement (PMC2786779)
Supplement: NIHMS158340-supplement-1_si_001.pdf [file NIHMS158340-supplement-1_si_001.pdf]

# Nanoparticle-mediated IgE-Receptor Aggregation and Signaling in RBL Mast Cells

Yu-Fen Huang<sup>†‡</sup>, Haipeng Liu<sup>†</sup>, Xiangling Xiong<sup>†</sup>, Yan  
Chen<sup>†</sup> and Weihong Tan<sup>†,\*</sup>

<sup>†</sup> Department of Chemistry and Department of Physiology and  
Functional Genomics  
Shands Cancer Center and Center for Research at Bio/nano  
Interface

UF Genetics Institute and McKnight Brain Institute  
University of Florida, Gainesville, FL 32611

<sup>‡</sup> Department of Biomedical Engineering and Environmental  
Sciences

National Tsing Hua University, 101, Sec 2, Kuang Fu Road,  
Hsinchu, Taiwan, ROC, 30013

E-mail: [tan@chem.ufl.edu](mailto:tan@chem.ufl.edu)

**Supplementary information**

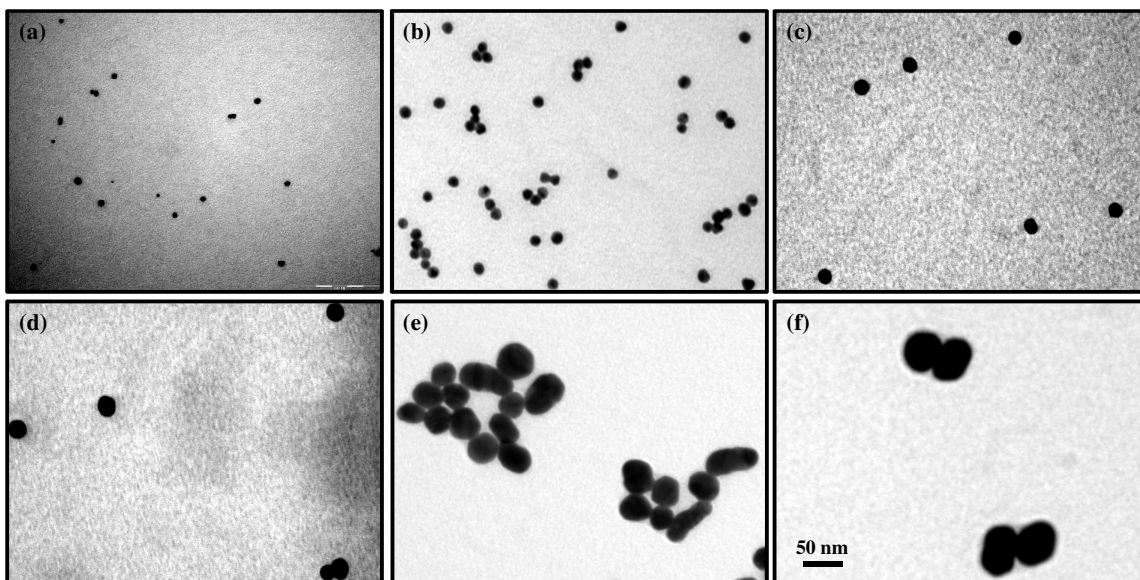

**Figure S1.** TEM images of AuNPs with (a)  $7.5 \pm 1.1$ , (b)  $15.4 \pm 1.5$ , (c)  $19.8 \pm 2.0$ , (d)  $25.8 \pm 3.5$ , (e)  $39.1 \pm 4.3$ , and (f)  $50.0 \pm 7.8$ -nm sizes.

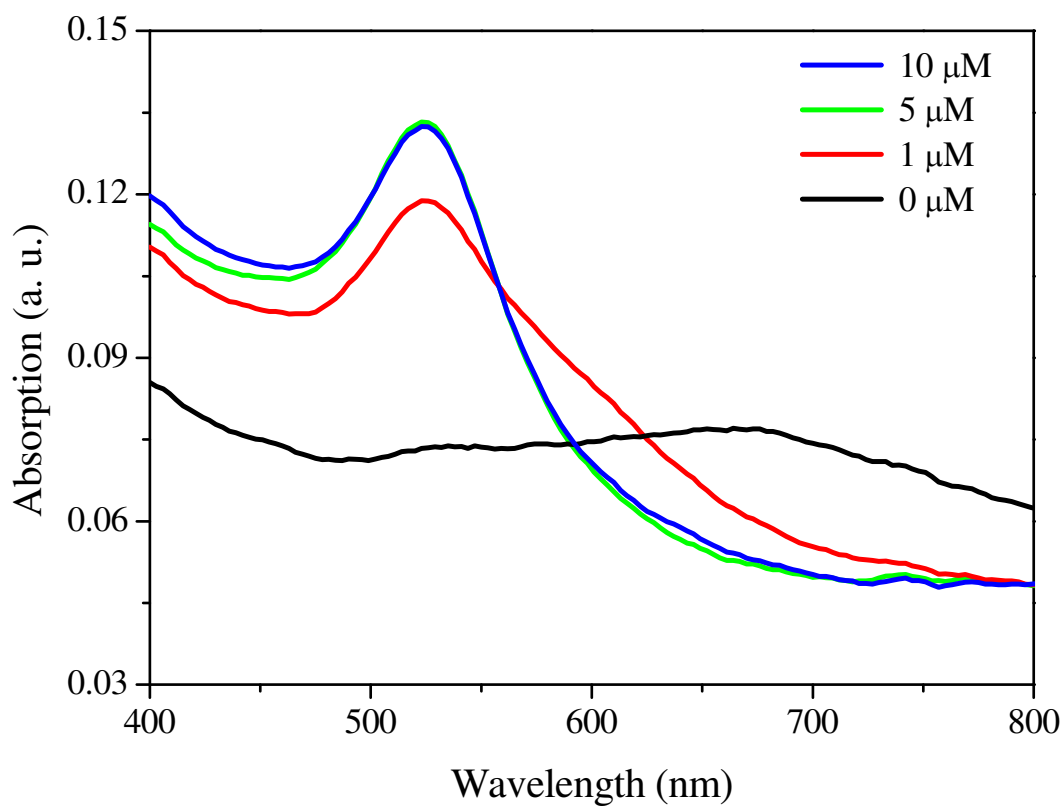

**Figure S2.** UV-Vis absorption measurements of AuNPs conjugated with different amounts of thiolated DNP. After overnight incubation, nanoparticles were subjected to two centrifugation cycles to remove excess DNP, and the pellets were then resuspended in 5 mM sodium tetraborate (pH 9.0).

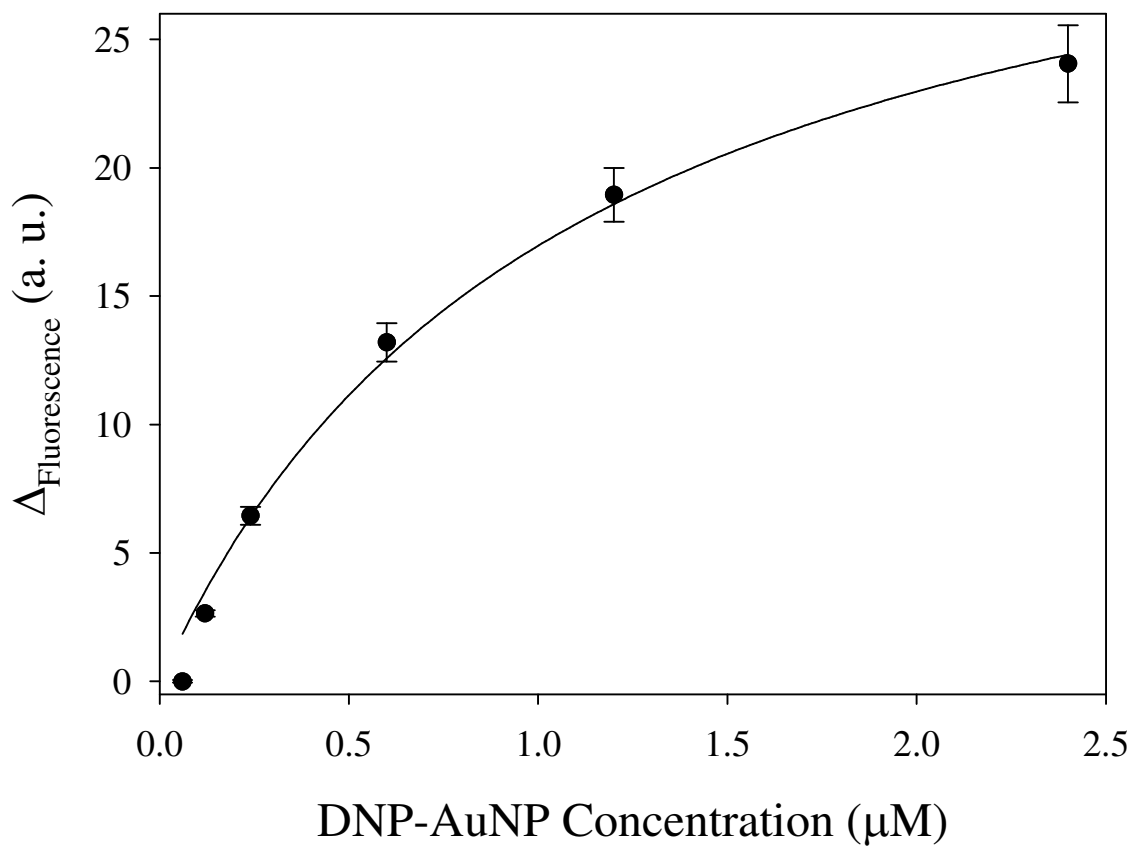

**Figure S3.** Binding assay of the DNP-AuNPs toward IgE-Fc $\epsilon$ RI on RBL-2H3 mast cells. Flow cytometry was performed to determine the fluorescence quenching of Alexa488-IgE on the cell membrane surfaces after the specific interaction with DNP-AuNPs (25.8-nm).

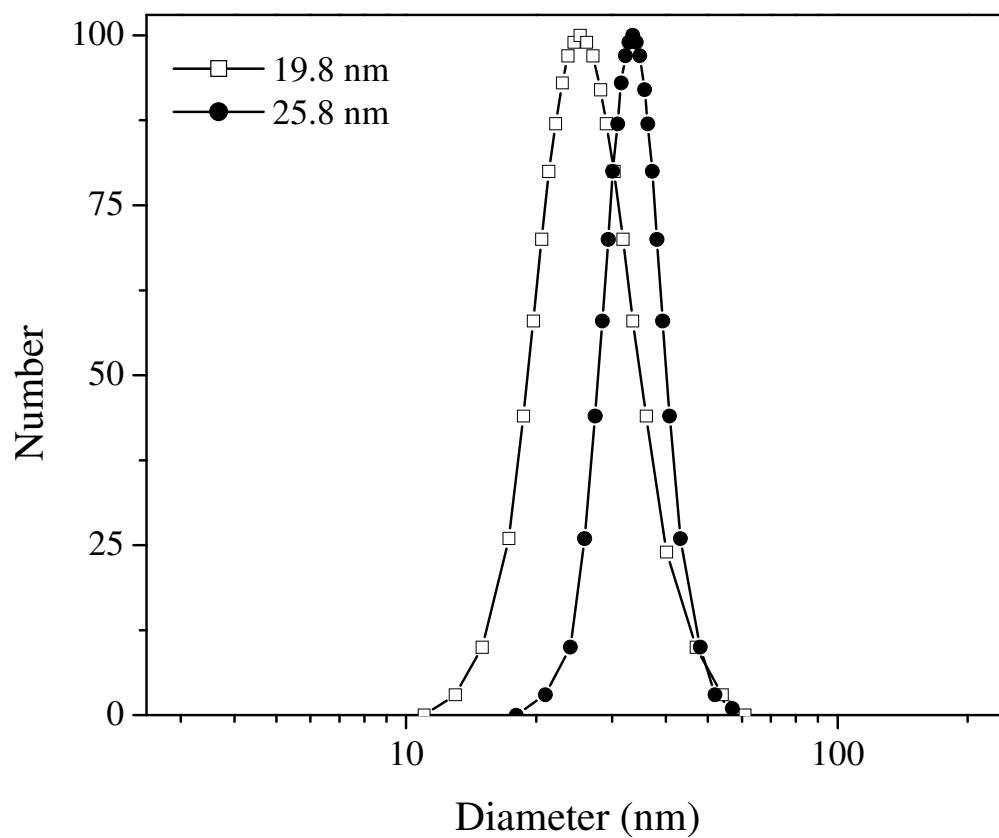

*Figure S4.* Hydrodynamic diameter measurement of DNP-AuNPs 19.8- and 25.8-nm in size, using dynamic light scattering (ZetaPlus, Brookhaven Instruments Corp., Holtsville, NY).
